# Supplementary material for: Transport properties of nitrile and carbonate solutions of [P66614][NTf2] ionic liquid, its thermal degradation and non-isothermal kinetics of decomposition
Source: Royal Society of Chemistry journal article supplement (doi:10.1039/d1cp03549e), 2021-01-01
Supplement: d1cp03549e1.pdf [file d1cp03549e1.pdf]

Supporting Information for

**Transport properties of nitrile and carbonate solutions of [P66614][NTf<sub>2</sub>]  
ionic liquid, its thermal degradation and non-isothermal kinetics of  
decomposition**

Ekaterina A. Arkhipova \*<sup>1</sup>, Anton S. Ivanov <sup>1</sup>, Sergei S. Reshetko <sup>1</sup>, Dmitry Yu. Aleshin <sup>2</sup>,

Konstantin I. Maslakov <sup>1</sup>, Stepan Yu. Kuprenko <sup>1</sup> and Serguei V. Savilov <sup>1</sup>

<sup>1</sup> Department of Chemistry, Lomonosov Moscow State University, 1–3 Leninskiye Gory,  
Moscow 119991, Russia

<sup>2</sup> A. N. Nesmeyanov Institute of Organoelement Compounds, Russian Academy of Sciences,  
Vavilov str., 28, Moscow 119991, Russia

ekaterina.a.arkhipova@gmail.com

**Table S1.** Viscosity and dielectric constant of used chemicals.

| Chemical                                                          | Abbreviation                | CAS No.     | Initial mass fraction purity | $\eta$ , mPa·s    | $\epsilon_r$      |
|-------------------------------------------------------------------|-----------------------------|-------------|------------------------------|-------------------|-------------------|
| acetonitrile                                                      | AN                          | 75-05-8     | $\geq 99.9\%$                | 0.3 <sup>1</sup>  | 36 <sup>1</sup>   |
| propionitrile                                                     | PN                          | 107-12-0    | 99.9 %                       | 0.42 <sup>2</sup> | 25.9 <sup>3</sup> |
| dimethyl carbonate                                                | DMC                         | 616-38-6    | $\geq 99.0\%$                | 0.59 <sup>1</sup> | 3.1 <sup>1</sup>  |
| diethyl carbonate                                                 | DEC                         | 105-58-8    | $\geq 99.0\%$                | 0.75 <sup>1</sup> | 2.8 <sup>1</sup>  |
| triethyl(tetradecyl)phosphonium bis(trifluoromethylsulfonyl)amide | [P66614][NTf <sub>2</sub> ] | 460092-03-9 | $\geq 95.0\%$                | 304 <sup>4</sup>  | –                 |

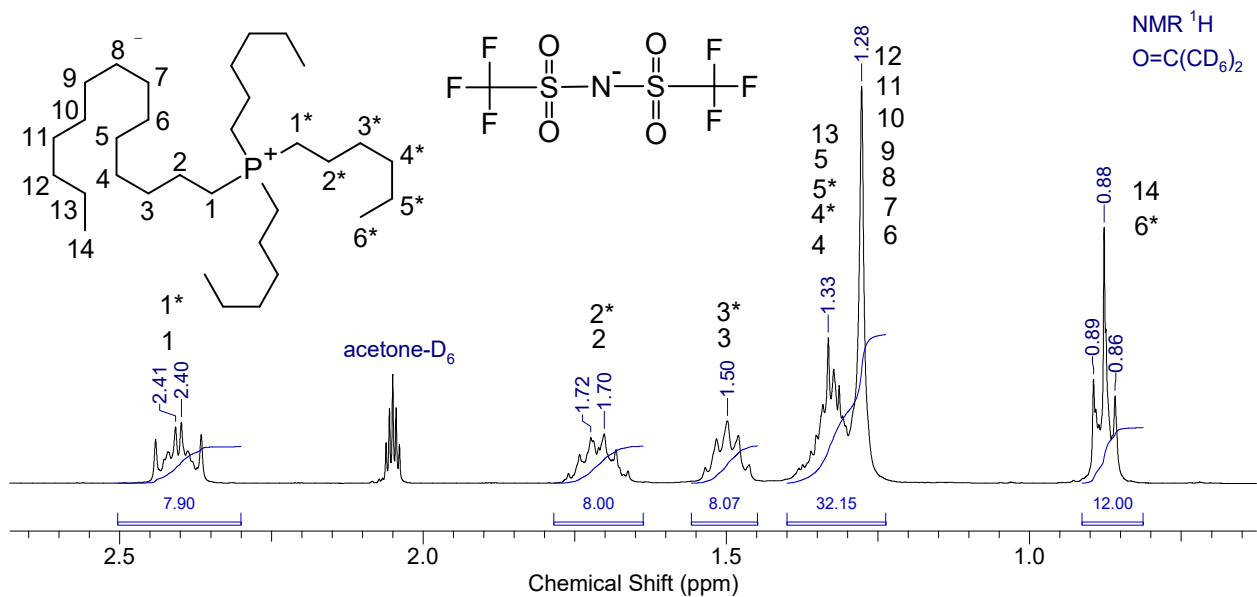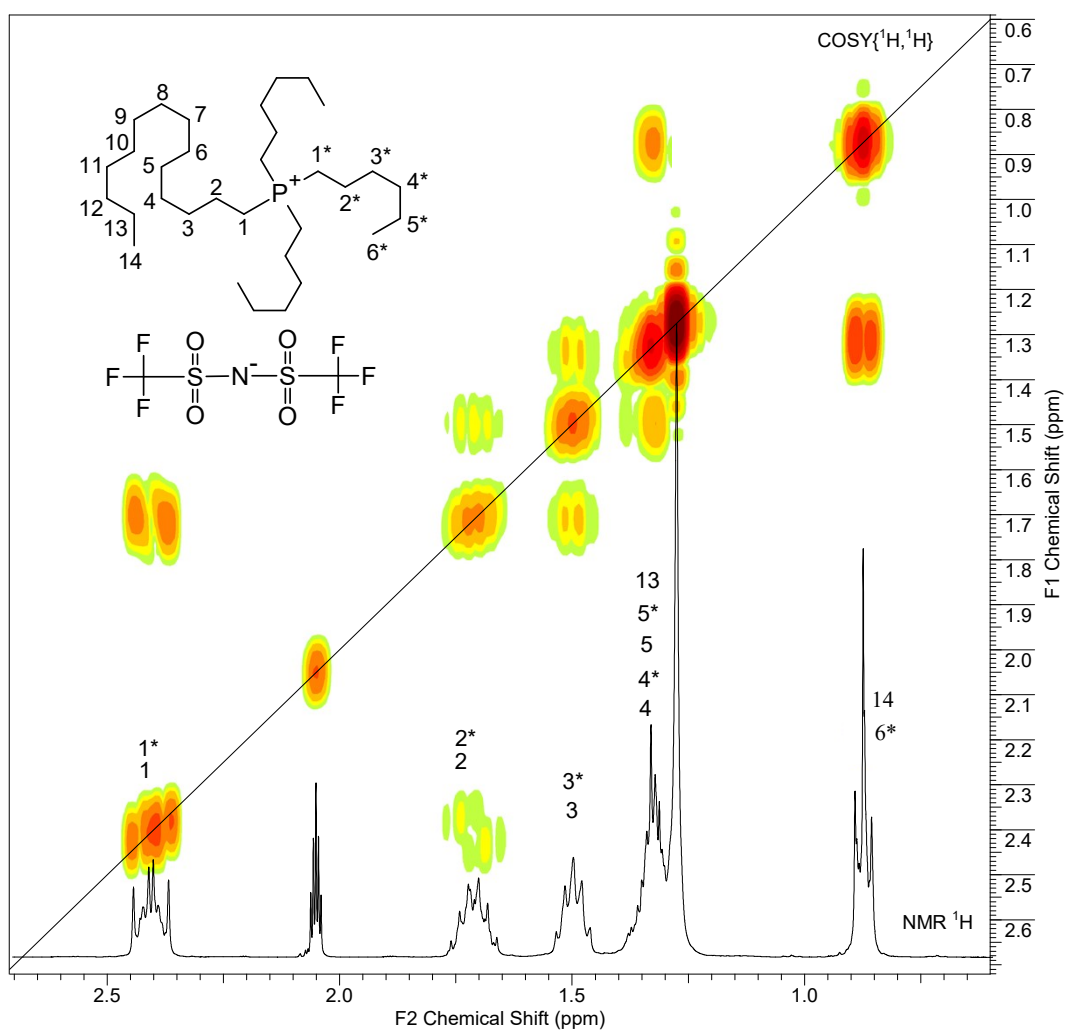

Figure S1. <sup>1</sup>H and COSY NMR spectra of [P66614][NTf<sub>2</sub>].



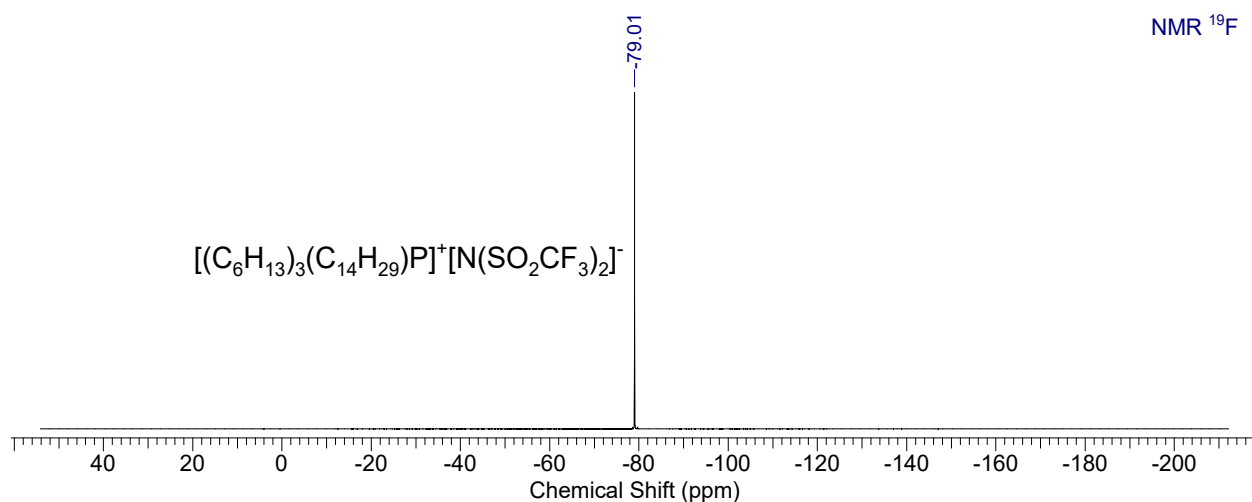

**Figure S4.** <sup>19</sup>F NMR spectrum of [P66614][NTf<sub>2</sub>].

**Table S2.** Interpretation of <sup>1</sup>H, <sup>13</sup>C, <sup>19</sup>F and <sup>31</sup>P NMR signals.

| NMR nucleus     | Chemical shift/ ppm | Number of nuclei | Multiplicity of signal                                 | Spin-spin coupling constant/ Hz | Interpretation                                                                                    |
|-----------------|---------------------|------------------|--------------------------------------------------------|---------------------------------|---------------------------------------------------------------------------------------------------|
| <sup>1</sup> H  | 2.41                | 8                | m.                                                     | -                               | 1, 1*                                                                                             |
|                 | 1.71                | 8                | m.                                                     | -                               | 2, 2*                                                                                             |
|                 | 1.50                | 8                | m.                                                     | -                               | 3, 3*                                                                                             |
|                 | 1.33                | 18               | m.                                                     | -                               | 4, 4*, 5, 5*, 13                                                                                  |
|                 | 1.28                | 14               | s.                                                     | -                               | 6, 7, 8, 9, 10, 11, 12                                                                            |
|                 | 0.88                | 12               | m.                                                     | -                               | 6*, 14                                                                                            |
| <sup>13</sup> C | 120.83              | 1                | q., <sup>1</sup> J ( <sup>13</sup> C- <sup>19</sup> F) | 321.46                          | CF <sub>3</sub>                                                                                   |
|                 | 32.70               | 1                | s.                                                     | -                               | 6                                                                                                 |
|                 | 31.76               | 3                | d., <sup>4</sup> J ( <sup>13</sup> C- <sup>31</sup> P) | 0.91                            | 4*                                                                                                |
|                 | 31.45               | 1                | d., <sup>3</sup> J ( <sup>13</sup> C- <sup>31</sup> P) | 15.19                           | 3                                                                                                 |
|                 | 31.17               | 3                | d., <sup>3</sup> J ( <sup>13</sup> C- <sup>31</sup> P) | 15.19                           | 3*                                                                                                |
|                 | 30.37               | 1                | s.                                                     | -                               | 7, 8, 9, 10, 11, 12, 13                                                                           |
|                 | 30.45               | 1                | s.                                                     | -                               |                                                                                                   |
|                 | 30.43               | 2                | s.                                                     | -                               |                                                                                                   |
|                 | 30.35               | 1                | s.                                                     | -                               |                                                                                                   |
|                 | 30.14               | 1                | s.                                                     | -                               |                                                                                                   |
|                 | 30.09               | 1                | s.                                                     | -                               |                                                                                                   |
|                 | 29.57               | 1                | d., <sup>4</sup> J ( <sup>13</sup> C- <sup>31</sup> P) | 0.91                            | 4                                                                                                 |
|                 | 23.39               | 1                | s.                                                     | -                               | 5                                                                                                 |
|                 | 23.07               | 3                | s.                                                     | -                               | 5*                                                                                                |
|                 | 22.02               | 4                | d., <sup>2</sup> J ( <sup>13</sup> C- <sup>31</sup> P) | 4.57                            | 2, 2*                                                                                             |
|                 | 19.20               | 3                | d., <sup>1</sup> J ( <sup>13</sup> C- <sup>31</sup> P) | 47.75                           | 1*                                                                                                |
|                 | 19.15               | 1                | d., <sup>1</sup> J ( <sup>13</sup> C- <sup>31</sup> P) | 47.75                           | 1                                                                                                 |
| 14.42           | 1                   | s.               | -                                                      | 14                              |                                                                                                   |
| 14.29           | 3                   | s.               | -                                                      | 6*                              |                                                                                                   |
| <sup>19</sup> F | -79.01              | 3                | s.                                                     | -                               | CF <sub>3</sub>                                                                                   |
| <sup>31</sup> P | 33.20               | 1                | s.                                                     | -                               | [P(C <sub>6</sub> H <sub>13</sub> ) <sub>3</sub> (C <sub>14</sub> H <sub>29</sub> )] <sup>+</sup> |

**Table S3.** Electrical conductivities ( $\sigma$ ) of [P66614][NTf<sub>2</sub>] binary solutions in AN, PC, DMC and DEC as function of IL mole fraction ( $x_i$ ) at T = 293 K measured in this work and calculated using the QSPR model.

| AN     |                                  |                                         | PN     |                                  |                                         | DMC    |                                  |                                         | DEC    |                                  |                                         |
|--------|----------------------------------|-----------------------------------------|--------|----------------------------------|-----------------------------------------|--------|----------------------------------|-----------------------------------------|--------|----------------------------------|-----------------------------------------|
| $x_i$  | $\sigma/$<br>mS·cm <sup>-1</sup> | $\sigma_{QSPR}/$<br>mS·cm <sup>-1</sup> |
| 1.0000 | 0.07                             | 0.47                                    | 1.0000 | 0.08                             | 0.48                                    | 1.0000 | 0.06                             | 0.47                                    | 1.0000 | 0.06                             | 0.46                                    |
| 0.5586 | 0.30                             | 0.69                                    | 0.6969 | 0.19                             | 0.58                                    | 0.6265 | 0.16                             | 0.55                                    | 0.6938 | 0.11                             | 0.51                                    |
| 0.4075 | 0.60                             | 0.95                                    | 0.5555 | 0.32                             | 0.70                                    | 0.4594 | 0.29                             | 0.68                                    | 0.5484 | 0.17                             | 0.57                                    |
| 0.3102 | 1.07                             | 1.38                                    | 0.4331 | 0.57                             | 0.93                                    | 0.3598 | 0.47                             | 0.84                                    | 0.4456 | 0.25                             | 0.63                                    |
| 0.2502 | 1.75                             | 2.00                                    | 0.3601 | 0.85                             | 1.19                                    | 0.2857 | 0.70                             | 1.05                                    | 0.3760 | 0.32                             | 0.70                                    |
| 0.2113 | 2.45                             | 2.64                                    | 0.2920 | 1.33                             | 1.62                                    | 0.2474 | 0.88                             | 1.21                                    | 0.3203 | 0.39                             | 0.77                                    |
| 0.1805 | 3.30                             | 3.41                                    | 0.2359 | 2.02                             | 2.25                                    | 0.2157 | 1.06                             | 1.37                                    | 0.2774 | 0.47                             | 0.84                                    |
| 0.1580 | 4.11                             | 4.14                                    | 0.1969 | 2.76                             | 2.92                                    | 0.1891 | 1.22                             | 1.52                                    | 0.2446 | 0.53                             | 0.89                                    |
| 0.1393 | 4.96                             | 4.92                                    | 0.1668 | 3.57                             | 3.65                                    | 0.1591 | 1.39                             | 1.67                                    | 0.2177 | 0.58                             | 0.94                                    |
| 0.1241 | 5.82                             | 5.71                                    | 0.1430 | 4.39                             | 4.41                                    | 0.1396 | 1.50                             | 1.77                                    | 0.1945 | 0.62                             | 0.98                                    |
| 0.1118 | 6.65                             | 6.45                                    | 0.1222 | 5.30                             | 5.23                                    | 0.1215 | 1.56                             | 1.83                                    | 0.1752 | 0.65                             | 1.00                                    |
| 0.1012 | 7.41                             | 7.14                                    | 0.1060 | 6.11                             | 5.97                                    | 0.1034 | 1.59                             | 1.86                                    | 0.1563 | 0.67                             | 1.02                                    |
| 0.0926 | 8.15                             | 7.82                                    | 0.0942 | 6.77                             | 6.57                                    | 0.0880 | 1.55                             | 1.82                                    | 0.1410 | 0.68                             | 1.03                                    |
| 0.0842 | 8.94                             | 8.53                                    | 0.0843 | 7.37                             | 7.11                                    | 0.0791 | 1.50                             | 1.77                                    | 0.1287 | 0.68                             | 1.03                                    |
| 0.0779 | 9.56                             | 9.10                                    | 0.0750 | 7.97                             | 7.66                                    | 0.0697 | 1.40                             | 1.68                                    | 0.1193 | 0.68                             | 1.03                                    |
| 0.0724 | 10.07                            | 9.57                                    | 0.0671 | 8.44                             | 8.08                                    | 0.0616 | 1.29                             | 1.58                                    | 0.1098 | 0.66                             | 1.01                                    |
| 0.0680 | 10.46                            | 9.92                                    | 0.0600 | 8.84                             | 8.45                                    | 0.0550 | 1.16                             | 1.47                                    | 0.1017 | 0.65                             | 1.00                                    |
| 0.0637 | 10.90                            | 10.32                                   | 0.0543 | 9.14                             | 8.72                                    | 0.0498 | 1.07                             | 1.38                                    | 0.0936 | 0.62                             | 0.98                                    |
| 0.0601 | 11.27                            | 10.65                                   | 0.0495 | 9.36                             | 8.92                                    | 0.0453 | 0.99                             | 1.31                                    | 0.0862 | 0.60                             | 0.96                                    |
| 0.0563 | 11.66                            | 11.01                                   | 0.0455 | 9.50                             | 9.04                                    | 0.0411 | 0.90                             | 1.23                                    | 0.0806 | 0.58                             | 0.94                                    |
| 0.0534 | 11.94                            | 11.26                                   | 0.0419 | 9.61                             | 9.15                                    | 0.0375 | 0.82                             | 1.15                                    | 0.0748 | 0.55                             | 0.91                                    |
| 0.0501 | 12.29                            | 11.58                                   | 0.0386 | 9.66                             | 9.19                                    | 0.0336 | 0.72                             | 1.07                                    | 0.0690 | 0.52                             | 0.88                                    |

|        |       |       |        |      |      |        |      |      |        |      |      |
|--------|-------|-------|--------|------|------|--------|------|------|--------|------|------|
| 0.0472 | 12.57 | 11.84 | 0.0358 | 9.68 | 9.21 | 0.0304 | 0.64 | 0.99 | 0.0630 | 0.48 | 0.85 |
| 0.0444 | 12.84 | 12.08 | 0.0322 | 9.61 | 9.14 | 0.0264 | 0.54 | 0.90 | 0.0576 | 0.45 | 0.82 |
| 0.0418 | 13.07 | 12.29 | 0.0293 | 9.50 | 9.04 | 0.0233 | 0.45 | 0.82 | 0.0522 | 0.41 | 0.78 |
| 0.0389 | 13.37 | 12.56 | 0.0265 | 9.34 | 8.90 | 0.0213 | 0.40 | 0.77 | 0.0464 | 0.37 | 0.74 |
| 0.0359 | 13.45 | 12.64 | 0.0241 | 9.14 | 8.72 | 0.0193 | 0.35 | 0.73 | 0.0414 | 0.33 | 0.71 |
| 0.0334 | 13.53 | 12.71 | 0.0221 | 8.94 | 8.54 | 0.0174 | 0.30 | 0.68 | 0.0353 | 0.27 | 0.66 |
| 0.0309 | 13.53 | 12.71 | 0.0197 | 8.63 | 8.26 |        |      |      | 0.0300 | 0.22 | 0.61 |
| 0.0283 | 13.52 | 12.70 | 0.0176 | 8.28 | 7.94 |        |      |      | 0.0256 | 0.18 | 0.57 |
| 0.0252 | 13.36 | 12.55 | 0.0156 | 7.87 | 7.56 |        |      |      | 0.0221 | 0.15 | 0.54 |
| 0.0222 | 13.02 | 12.24 | 0.0142 | 7.47 | 7.20 |        |      |      | 0.0196 | 0.12 | 0.52 |
| 0.0199 | 12.80 | 12.05 |        |      |      |        |      |      |        |      |      |
| 0.0182 | 12.50 | 11.77 |        |      |      |        |      |      |        |      |      |
| 0.0166 | 12.18 | 11.48 |        |      |      |        |      |      |        |      |      |
| 0.0152 | 11.81 | 11.15 |        |      |      |        |      |      |        |      |      |
| 0.0142 | 11.48 | 10.85 |        |      |      |        |      |      |        |      |      |
| 0.0132 | 11.12 | 10.52 |        |      |      |        |      |      |        |      |      |
| 0.0123 | 10.82 | 10.25 |        |      |      |        |      |      |        |      |      |

Standard uncertainties:  $u(\sigma) = \pm 0.02 \text{ mS}\cdot\text{cm}^{-1}$ ,  $u(T) = \pm 0.05 \text{ K}$ .

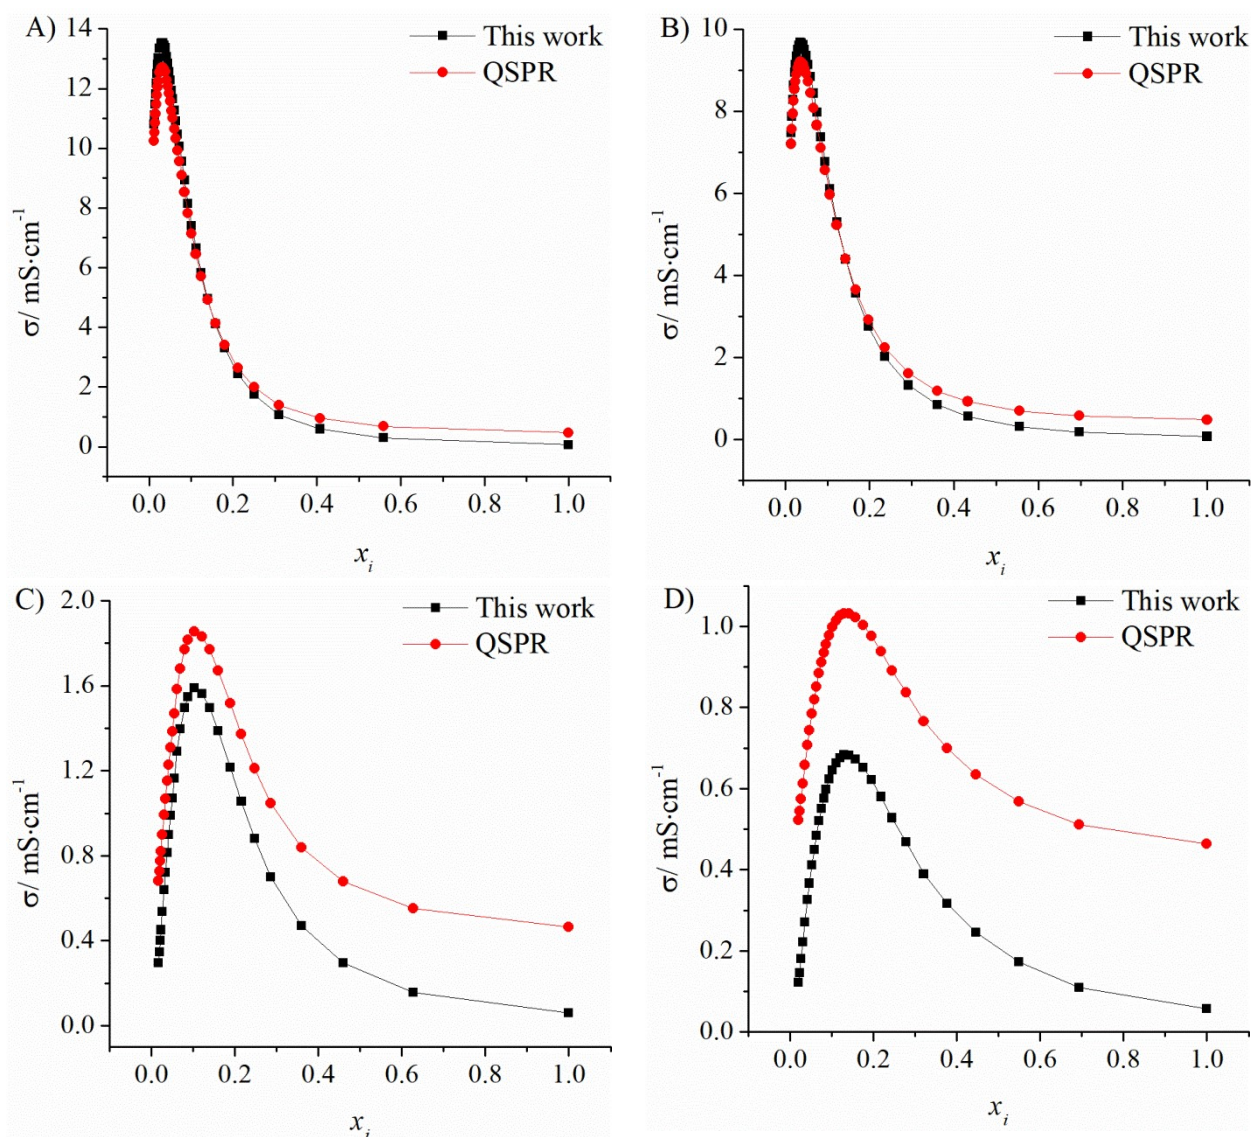

**Figure S5.** Comparison between experimental and calculated with QSPR model electrical conductivities of [P66614][NTf<sub>2</sub>] binary solutions in AN (a), PC (b), DMC (c) and DEC (d).



**Table S4.** Electrical conductivity ( $\sigma$ ) of [P66614][NTf<sub>2</sub>] binary solutions in AN, PC, DMC and DEC as function of IL mole fraction ( $x_i$ ) at T = (298 – 348) K.

| $x_i$                             | $\sigma / \text{mS} \cdot \text{cm}^{-1}$ |                    |       |       |       |       |       |       |       |       |       |
|-----------------------------------|-------------------------------------------|--------------------|-------|-------|-------|-------|-------|-------|-------|-------|-------|
|                                   | 298 K                                     | 303 K              | 308 K | 313 K | 318 K | 323 K | 328 K | 333 K | 338 K | 343 K | 348 K |
| [P66614][NTf <sub>2</sub> ]       |                                           |                    |       |       |       |       |       |       |       |       |       |
| This work                         | 0.08                                      | 0.10               | 0.13  | 0.17  | 0.20  | 0.26  | 0.31  | 0.38  | 0.46  | 0.55  | 0.65  |
| Ref.                              | 0.104 <sup>5</sup><br>0.108 <sup>6</sup>  | 0.134 <sup>5</sup> |       |       |       |       |       |       |       |       |       |
| [P66614][NTf <sub>2</sub> ] + AN  |                                           |                    |       |       |       |       |       |       |       |       |       |
| 0.0200                            | 11.46                                     | 12.08              | 12.73 | 13.37 | 14.03 | 14.72 | 15.38 | 16.05 | 16.75 | 17.46 | 18.16 |
| 0.0308                            | 14.39                                     | 15.24              | 16.11 | 16.98 | 17.87 | 18.75 | 19.63 | 20.50 | 21.39 | 22.28 | 23.17 |
| 0.0500                            | 12.96                                     | 13.86              | 14.77 | 15.67 | 16.58 | 17.52 | 18.47 | 19.43 | 20.38 | 21.36 | 22.35 |
| 0.1000                            | 7.74                                      | 8.45               | 9.18  | 9.90  | 10.60 | 11.35 | 12.14 | 13.01 | 13.86 | 14.67 | 15.52 |
| 0.1500                            | 4.80                                      | 5.35               | 5.92  | 6.51  | 7.08  | 7.65  | 8.23  | 8.82  | 9.47  | 10.15 | 10.87 |
| 0.2000                            | 2.95                                      | 3.36               | 3.79  | 4.23  | 4.67  | 5.11  | 5.55  | 5.97  | 6.57  | 7.14  | 7.71  |
| [P66614][NTf <sub>2</sub> ] + PN  |                                           |                    |       |       |       |       |       |       |       |       |       |
| 0.0200                            | 9.25                                      | 9.75               | 10.24 | 10.73 | 11.25 | 11.74 | 12.24 | 12.74 | 13.23 | 13.72 | 14.22 |
| 0.0373                            | 10.33                                     | 10.96              | 11.60 | 12.27 | 12.92 | 13.58 | 14.26 | 14.93 | 15.59 | 16.26 | 16.92 |
| 0.0500                            | 9.96                                      | 10.62              | 11.31 | 11.98 | 12.69 | 13.42 | 14.13 | 14.84 | 15.56 | 16.28 | 17.00 |
| 0.1000                            | 6.67                                      | 7.26               | 7.87  | 8.51  | 9.14  | 9.80  | 10.49 | 11.17 | 11.87 | 12.59 | 13.33 |
| 0.1500                            | 3.98                                      | 4.43               | 4.90  | 5.39  | 5.89  | 6.40  | 6.94  | 7.51  | 8.09  | 8.67  | 9.25  |
| 0.2000                            | 2.58                                      | 2.93               | 3.32  | 3.69  | 4.08  | 4.51  | 4.96  | 5.43  | 5.94  | 6.41  | 6.95  |
| [P66614][NTf <sub>2</sub> ] + DMC |                                           |                    |       |       |       |       |       |       |       |       |       |
| 0.0200                            | 0.41                                      | 0.46               | 0.51  | 0.58  | 0.64  | 0.70  | 0.76  | 0.83  | 0.91  | 0.97  | 1.05  |
| 0.0500                            | 1.16                                      | 1.34               | 1.49  | 1.66  | 1.83  | 2.01  | 2.19  | 2.38  | 2.58  | 2.79  | 2.99  |
| 0.1100                            | 1.64                                      | 1.86               | 2.08  | 2.32  | 2.58  | 2.84  | 3.12  | 3.41  | 3.72  | 4.01  | 4.31  |
| 0.1500                            | 1.43                                      | 1.63               | 1.83  | 2.07  | 2.30  | 2.57  | 2.84  | 3.11  | 3.42  | 3.71  | 4.04  |
| 0.2000                            | 1.13                                      | 1.32               | 1.49  | 1.69  | 1.91  | 2.14  | 2.39  | 2.65  | 2.92  | 3.21  | 3.49  |
| 0.5000                            | 0.28                                      | 0.34               | 0.42  | 0.50  | 0.61  | 0.70  | 0.82  | 0.94  | 1.09  | 1.24  | 1.39  |
| [P66614][NTf <sub>2</sub> ] + DEC |                                           |                    |       |       |       |       |       |       |       |       |       |
| 0.0200                            | 0.13                                      | 0.15               | 0.17  | 0.19  | 0.21  | 0.24  | 0.26  | 0.27  | 0.30  | 0.33  | 0.35  |

|        |      |      |      |      |      |      |      |      |      |      |      |
|--------|------|------|------|------|------|------|------|------|------|------|------|
| 0.0500 | 0.44 | 0.50 | 0.56 | 0.63 | 0.70 | 0.77 | 0.85 | 0.93 | 1.02 | 1.11 | 1.21 |
| 0.1000 | 0.71 | 0.82 | 0.94 | 1.05 | 1.18 | 1.31 | 1.45 | 1.60 | 1.74 | 1.91 | 2.06 |
| 0.1380 | 0.79 | 0.91 | 1.03 | 1.17 | 1.32 | 1.48 | 1.64 | 1.82 | 1.98 | 2.17 | 2.36 |
| 0.1500 | 0.75 | 0.86 | 0.99 | 1.12 | 1.27 | 1.42 | 1.59 | 1.76 | 1.93 | 2.13 | 2.33 |
| 0.2000 | 0.69 | 0.80 | 0.92 | 1.06 | 1.21 | 1.35 | 1.52 | 1.71 | 1.89 | 2.09 | 2.31 |
| 0.5000 | 0.21 | 0.26 | 0.31 | 0.39 | 0.46 | 0.55 | 0.64 | 0.75 | 0.86 | 0.99 | 1.14 |

Standard uncertainties:  $u(\sigma) = \pm 0.02 \text{ mS} \cdot \text{cm}^{-1}$ ,  $u(T) = \pm 0.05 \text{ K}$ .

**Table S5.** Coefficients of determination ( $R^2$ ) and values of parameters of the best-fit to  $E_a^A$  and  $A_\sigma^A$  dependencies from  $x$  with Eq. 4 – 5.

| Solvents | $E_a^A$ (Eq. 4) |           |          |        | $A_\sigma^A$ (Eq. 5) |           |        |
|----------|-----------------|-----------|----------|--------|----------------------|-----------|--------|
|          | $a$             | $b$       | $d$      | $R^2$  | $c$                  | $f$       | $R^2$  |
| AN       | 1.88±0.26       | 0.12±0.03 | 4.7±0.5  | 0.9928 | 4.94±0.16            | 0.58±0.04 | 0.9849 |
| PN       | 2.46±0.27       | 0.08±0.03 | 3.5±0.5  | 0.9930 | 4.13±0.11            | 0.80±0.03 | 0.9970 |
| DMC      | 0.32±0.20       | 0.23±0.02 | 15.2±0.4 | 0.9945 | 4.95±0.17            | 0.62±0.04 | 0.9896 |
| DEC      | 0.26±0.07       | 0.18±0.03 | 15.3±0.6 | 0.9896 | 4.22±0.22            | 0.81±0.05 | 0.9893 |

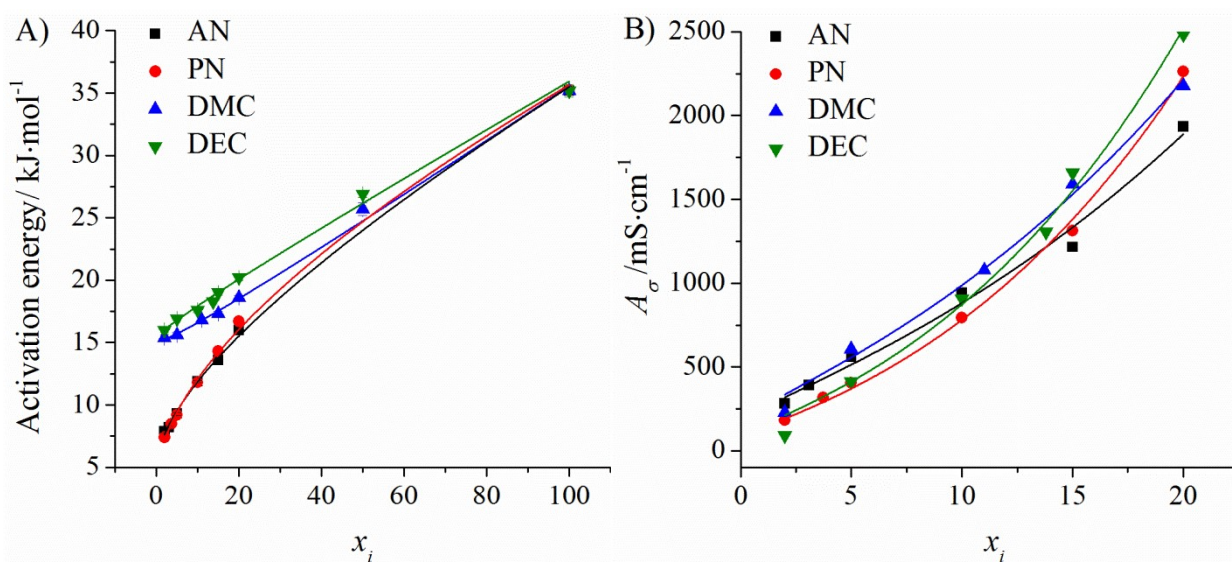

**Fig. S6.** Arrhenius activation energy (a) and pre-exponential factor (b) vs. mole fraction of [P66614][NTf<sub>2</sub>] in binary solutions. Solid lines show the best fit curves.

**Table S6.** Experimental and literature densities of [P66614][NTf<sub>2</sub>] binary solutions in AN, PN, DMC and DEC at atmospheric pressure in the temperature range of T = (293 – 348) K. Mole fractions of [P66614][NTf<sub>2</sub>] in solutions correspond to their highest conductivities (see Table 2).

| T/ K | $\rho / \text{g} \cdot \text{cm}^{-3}$ |                                                                     |                               |                               |                               |                               |
|------|----------------------------------------|---------------------------------------------------------------------|-------------------------------|-------------------------------|-------------------------------|-------------------------------|
|      | [P66614][NTf <sub>2</sub> ]            |                                                                     | [P66614][NTf <sub>2</sub> ] + |
|      | This work                              | References                                                          | AN                            | PN                            | DMC                           | DEC                           |
| 293  | 1.0885                                 | 1.080 <sup>7</sup> , 1.0711 <sup>8</sup> , 1.0676 <sup>9</sup>      | 0.8751                        | 0.8683                        | 1.0795                        | 1.0325                        |
| 298  | 1.0849                                 | 1.065 <sup>10</sup> , 1.070390 <sup>11</sup> , 1.0501 <sup>12</sup> | 0.8701                        | 0.8637                        | 1.0746                        | 1.0279                        |
| 303  | 1.0811                                 | 1.066774 <sup>11</sup> , 1.0483 <sup>12</sup> , 1.0603 <sup>9</sup> | 0.8649                        | 0.8589                        | 1.0696                        | 1.0234                        |
| 308  | 1.0775                                 | 1.0452 <sup>12</sup>                                                | 0.8598                        | 0.8543                        | 1.0647                        | 1.0188                        |
| 313  | 1.0739                                 | 1.059538 <sup>11</sup> , 1.0420 <sup>12</sup> , 1.0529 <sup>9</sup> | 0.8549                        | 0.8496                        | 1.0599                        | 1.0144                        |
| 318  | 1.0700                                 | 1.0392 <sup>12</sup>                                                | 0.8497                        | 0.8448                        | 1.0548                        | 1.0097                        |
| 323  | 1.0660                                 | 1.052297 <sup>11</sup> , 1.0356 <sup>12</sup> , 1.0457 <sup>9</sup> | 0.8443                        | 0.8398                        | 1.0496                        | 1.0048                        |
| 328  | 1.0624                                 | 1.0329 <sup>12</sup>                                                | 0.8392                        | 0.8351                        | 1.0446                        | 1.0002                        |
| 333  | 1.0588                                 | 1.045089 <sup>11</sup> , 1.0296 <sup>12</sup> , 1.0386 <sup>9</sup> | 0.8342                        | 0.8304                        | 1.0398                        | 0.9957                        |
| 338  | 1.0555                                 |                                                                     | 0.8291                        | 0.8258                        | 1.035                         | 0.9913                        |
| 343  | 1.0515                                 | 1.0315 <sup>9</sup>                                                 | 0.8237                        | 0.8207                        | 1.0297                        | 0.9864                        |
| 348  | 1.0477                                 |                                                                     | 0.8183                        | 0.8158                        | 1.0245                        | 0.9817                        |

Standard uncertainties:  $u(\rho) = \pm 1.0 \cdot 10^{-4} \text{ g} \cdot \text{cm}^{-3}$ ,  $u(T) = \pm 0.05 \text{ K}$ .

**Table S7.** Values of parameters of the best-fits to temperature dependencies of density of [P66614][NTf<sub>2</sub>] solutions with Eq. (8).

|                                   | A/ g·cm <sup>-3</sup> | B·10 <sup>4</sup> / g·cm <sup>-3</sup> ·K <sup>-1</sup> | R <sup>2</sup> |
|-----------------------------------|-----------------------|---------------------------------------------------------|----------------|
| [P66614][NTf <sub>2</sub> ]       | 1.3059                | -7.42                                                   | 0.9998         |
| [P66614][NTf <sub>2</sub> ] + AN  | 1.1772                | -10.15                                                  | 0.9999         |
| [P66614][NTf <sub>2</sub> ] + PN  | 1.1480                | -9.54                                                   | 0.9999         |
| [P66614][NTf <sub>2</sub> ] + DMC | 1.372                 | -9.98                                                   | 0.9999         |
| [P66614][NTf <sub>2</sub> ] + DEC | 1.3038                | -9.23                                                   | 0.9999         |

**Table S8.** Isobaric thermal expansion coefficients of [P66614][NTf<sub>2</sub>] and its AN, PC, DMC and DEC solutions calculated using Eq. (9). Mole fractions of [P66614][NTf<sub>2</sub>] in solutions correspond to their highest conductivities (see Table 1).

| T/ K | $\alpha_p \cdot 10^4/ \text{K}^{-1}$ |                                     |                                     |                                      |                                      |
|------|--------------------------------------|-------------------------------------|-------------------------------------|--------------------------------------|--------------------------------------|
|      | [P66614][NTf <sub>2</sub> ]          | [P66614][NTf <sub>2</sub> ]<br>+ AN | [P66614][NTf <sub>2</sub> ]<br>+ PN | [P66614][NTf <sub>2</sub> ]<br>+ DMC | [P66614][NTf <sub>2</sub> ]<br>+ DEC |
| 293  | 6.82                                 | 11.54                               | 10.98                               | 9.24                                 | 8.93                                 |
| 298  | 6.84,<br>5.71 <sup>12</sup>          | 11.60                               | 11.05                               | 9.29                                 | 8.97                                 |
| 303  | 6.86                                 | 11.67                               | 11.11                               | 9.33                                 | 9.01                                 |
| 308  | 6.89                                 | 11.74                               | 11.17                               | 9.37                                 | 9.05                                 |
| 313  | 6.91                                 | 11.81                               | 11.23                               | 9.42                                 | 9.09                                 |
| 318  | 6.93                                 | 11.88                               | 11.29                               | 9.46                                 | 9.14                                 |
| 323  | 6.96                                 | 11.95                               | 11.36                               | 9.51                                 | 9.18                                 |
| 328  | 6.98                                 | 12.02                               | 11.42                               | 9.55                                 | 9.22                                 |
| 333  | 7.01                                 | 12.09                               | 11.49                               | 9.60                                 | 9.26                                 |
| 338  | 7.03                                 | 12.17                               | 11.56                               | 9.65                                 | 9.31                                 |
| 343  | 7.06                                 | 12.24                               | 11.62                               | 9.69                                 | 9.35                                 |
| 348  | 7.08                                 | 12.32                               | 11.69                               | 9.74                                 | 9.39                                 |

Standard uncertainty:  $u(T) = \pm 0.05 \text{ K}$ .

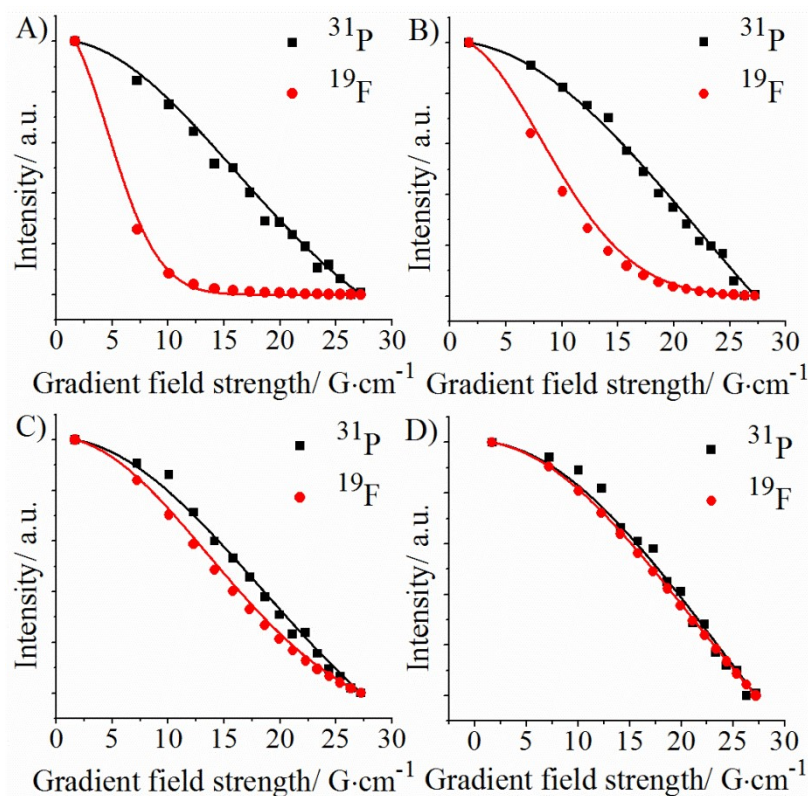

**Fig. S7.** NMR intensity – gradient strength plots of [P66614][NTf<sub>2</sub>] solutions in AN (a), PN (b), DMC (c) and DEC (d). Solid lines show the best fit curves.

**Table S9.** Values of parameters of the best-fits to NMR intensity – gradient strength

plots (Fig. S6) with Stejskal–Tanner equation  $I = I_0 e^{-D\gamma^2 g^2 \delta^2 (\Delta - \frac{\delta}{3} - \frac{\tau}{2})}$ .

|                                                    | $I_0$ | $\delta/ s$ | $\gamma/ \text{Hz}\cdot\text{G}^{-1}$ | $\Delta/ s$ | $\tau/ s$ |
|----------------------------------------------------|-------|-------------|---------------------------------------|-------------|-----------|
| [P66614][NTf <sub>2</sub> ] + AN/ <sup>19</sup> F  | 12373 | 0.005       | 4005.3                                | 0.15        | 0.0002    |
| [P66614][NTf <sub>2</sub> ] + AN/ <sup>31</sup> P  | 11338 | 0.004       | 1723.5                                | 0.15        | 0.0002    |
| [P66614][NTf <sub>2</sub> ] + PN/ <sup>19</sup> F  | 12519 | 0.004       | 4005.3                                | 0.1         | 0.0002    |
| [P66614][NTf <sub>2</sub> ] + PN/ <sup>31</sup> P  | 12402 | 0.004       | 1723.5                                | 0.1         | 0.0002    |
| [P66614][NTf <sub>2</sub> ] + DMC/ <sup>19</sup> F | 18169 | 0.005       | 4005.3                                | 0.15        | 0.0002    |
| [P66614][NTf <sub>2</sub> ] + DMC/ <sup>31</sup> P | 5574  | 0.005       | 1723.5                                | 0.5         | 0.0002    |
| [P66614][NTf <sub>2</sub> ] + DEC/ <sup>19</sup> F | 18437 | 0.005       | 4005.3                                | 0.1         | 0.0002    |
| [P66614][NTf <sub>2</sub> ] + DEC/ <sup>31</sup> P | 11053 | 0.005       | 1723.5                                | 0.5         | 0.0002    |

**Table S10.** PFG-NMR intensities of  $^{19}\text{F}$  and  $^{31}\text{P}$  PFG-NMR used for calculation of cation and anion diffusion coefficients in [P66614][NTf<sub>2</sub>] solutions in AN, PN, DMC and DEC.

| g/ G·cm <sup>-1</sup> | [P66614][NTf <sub>2</sub> ] + AN |                            | [P66614][NTf <sub>2</sub> ] + PN |                            | [P66614][NTf <sub>2</sub> ] + DMC |                            | [P66614][NTf <sub>2</sub> ] + DEC |                            |
|-----------------------|----------------------------------|----------------------------|----------------------------------|----------------------------|-----------------------------------|----------------------------|-----------------------------------|----------------------------|
|                       | <i>I</i> – $^{19}\text{F}$       | <i>I</i> – $^{31}\text{P}$ | <i>I</i> – $^{19}\text{F}$       | <i>I</i> – $^{31}\text{P}$ | <i>I</i> – $^{19}\text{F}$        | <i>I</i> – $^{31}\text{P}$ | <i>I</i> – $^{19}\text{F}$        | <i>I</i> – $^{31}\text{P}$ |
| 1.703                 | 11537                            | 11273                      | 12245                            | 12366                      | 18023                             | 5549                       | 18377                             | 11026                      |
| 7.224                 | 3216                             | 9974                       | 8068                             | 11797                      | 15583                             | 5213                       | 17374                             | 10731                      |
| 10.074                | 1269                             | 9177                       | 5402                             | 11247                      | 13490                             | 5045                       | 16394                             | 10465                      |
| 12.279                | 764                              | 8279                       | 3714                             | 10807                      | 11710                             | 4498                       | 15497                             | 10103                      |
| 14.145                | 583                              | 7213                       | 2639                             | 10496                      | 10166                             | 4081                       | 14650                             | 9310                       |
| 15.791                | 504                              | 7063                       | 1968                             | 9668                       | 8880                              | 3831                       | 13861                             | 9047                       |
| 17.282                | 455                              | 6249                       | 1526                             | 9155                       | 7753                              | 3555                       | 13111                             | 8892                       |
| 18.653                | 417                              | 5300                       | 1217                             | 8608                       | 6790                              | 3273                       | 12420                             | 8224                       |
| 19.931                | 399                              | 5264                       | 1019                             | 8266                       | 5981                              | 3012                       | 11722                             | 8031                       |
| 21.131                | 378                              | 4857                       | 895                              | 7849                       | 5296                              | 2731                       | 11102                             | 7411                       |
| 22.267                | 355                              | 4461                       | 795                              | 7418                       | 4677                              | 2755                       | 10518                             | 7375                       |
| 23.348                | 358                              | 3752                       | 725                              | 7299                       | 4164                              | 2449                       | 9957                              | 6811                       |
| 24.381                | 330                              | 3861                       | 651                              | 7107                       | 3714                              | 2223                       | 9446                              | 6559                       |
| 25.371                | 332                              | 3382                       | 642                              | 6423                       | 3335                              | 2118                       | 8944                              | 6449                       |
| 26.325                | 333                              | 2865                       | 602                              | 6057                       | 2996                              | 1947                       | 8488                              | 5946                       |
| 27.245                | 325                              | 2920                       | 589                              | 6077                       | 2720                              | 1877                       | 8049                              | 5996                       |

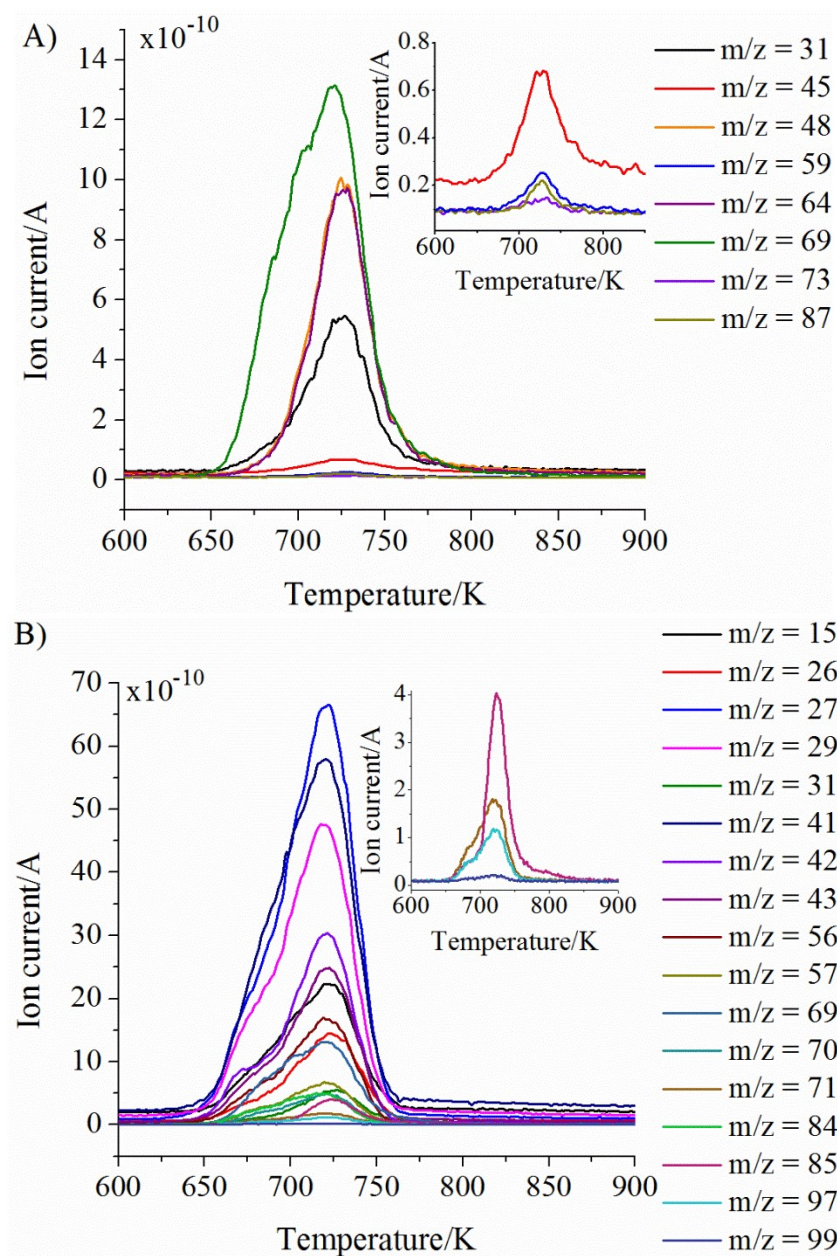

**Figure S8.** Ion current profiles of thermal decomposition of [P66614][NTf<sub>2</sub>] in Ar atmosphere.



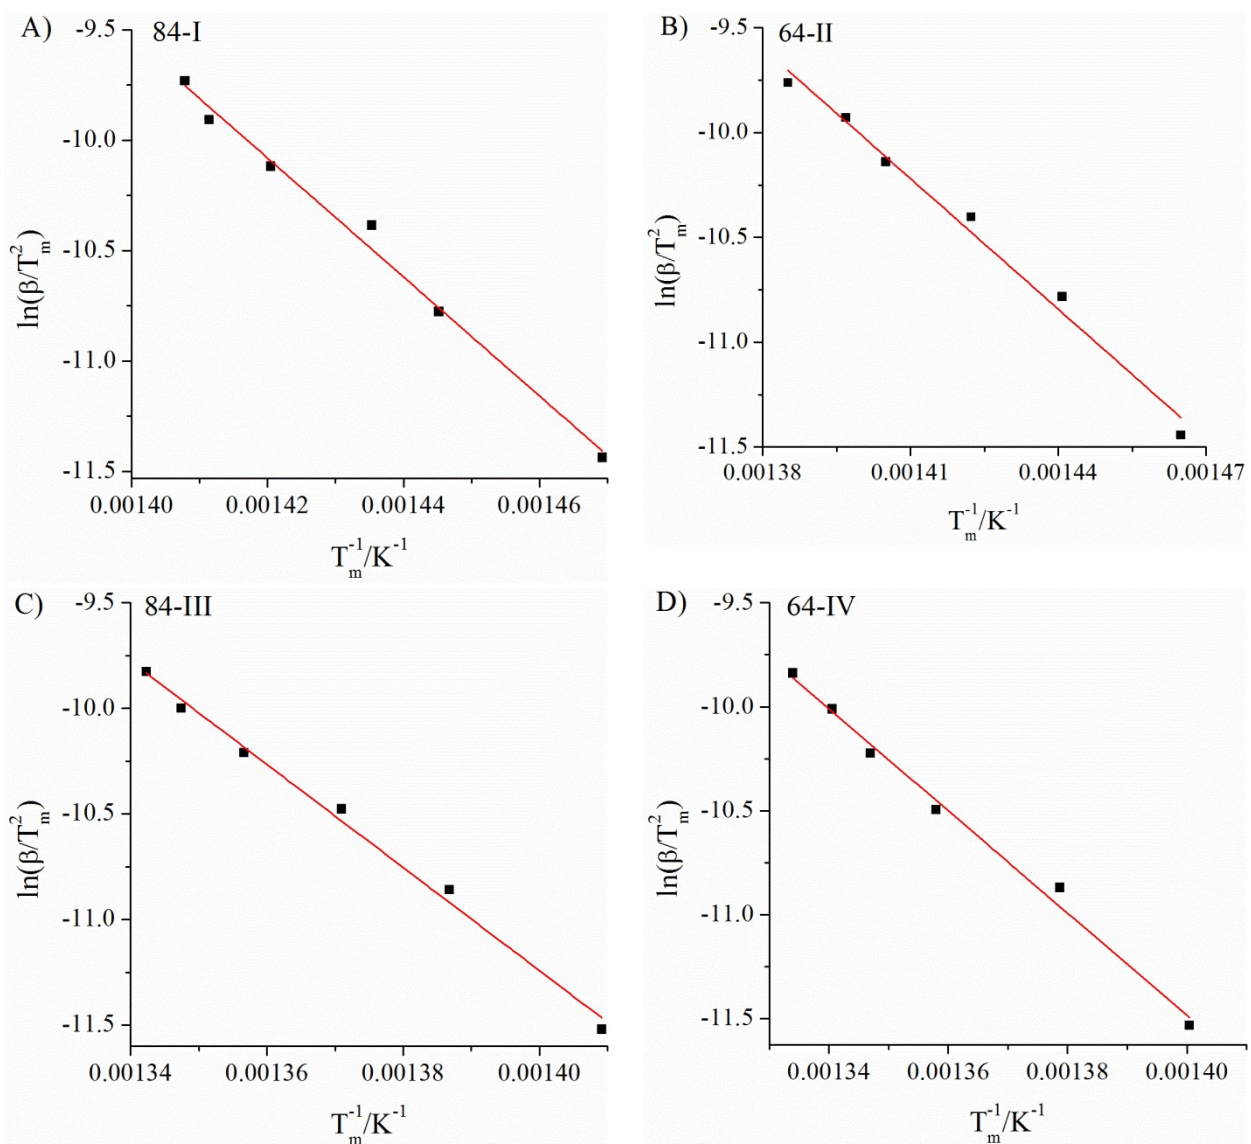

**Figure S9.** Kissinger plots for the decomposition of [P66614][NTf<sub>2</sub>] in Ar atmosphere.

## References

- 1 M. Ue, in *Encyclopedia of Electrochemical Power Sources*, Elsevier, 2009, pp. 71–84.
- 2 H. H. Ghazoyan, Z. L. Grigoryan, L. S. Gabrielyan and S. A. Markarian, Study of thermodynamic properties of binary mixtures of propionitrile with dimethylsulfoxide (or diethylsulfoxide) at temperatures from (298.15 to 323.15)K, *J. Mol. Liq.*, 2019, **284**, 147–156.
- 3 J. K. Eloranta and P. K. Kadaba, Dielectric relaxation in the mixtures of some nitriles, *Trans. Faraday Soc.*, 1970, **66**, 817–823.
- 4 N. A. Kermani, I. Petrushina, A. Nikiforov, J. O. Jensen and M. Rokni, Corrosion behavior of construction materials for ionic liquid hydrogen compressor, *Int. J. Hydrogen Energy*, 2016, **41**, 16688–16695.
- 5 A. Hernández Battez, M. Bartolomé, D. Blanco, J. L. Viesca, A. Fernández-González and R. González, Phosphonium cation-based ionic liquids as neat lubricants: Physicochemical and tribological performance, *Tribol. Int.*, 2016, **95**, 118–131.
- 6 R. P. Morco, J. M. Joseph and J. C. Wren, The chemical stability of phosphonium-based ionic liquids under gamma irradiation, *RSC Adv.*, 2015, **5**, 28570–28581.
- 7 R. E. Del Sesto, C. Corley, A. Robertson and J. S. Wilkes, Tetraalkylphosphonium-based ionic liquids, *J. Organomet. Chem.*, 2005, **690**, 2536–2542.
- 8 N. Rivera, A. García, R. González, A. Fernández-González, A. Hernández Battez and M. Cadenas, Ionic-liquid lubrication of a nickel-based coating reinforced with tungsten carbide particles, *J. Mol. Liq.*, 2019, **293**, 111498.
- 9 J. Jacquemin, R. Ge, P. Nancarrow, D. W. Rooney, M. F. Costa Gomes, A. A. H. Padua and C. Hardacre, Prediction of ionic liquid properties. I. Volumetric properties as a function of temperature at 0.1 MPa (Journal of Chemical and Engineering Data (2008) 55 (716-726)), *J. Chem. Eng. Data*, 2008, **53**, 2473.
- 10 G. McHale, C. Hardacre, R. Ge, N. Doy, R. W. K. Allen, J. M. MacInnes, M. R. Bown and M. I. Newton, Density-viscosity product of small-volume ionic liquid samples using quartz crystal impedance analysis, *Anal. Chem.*, 2008, **80**, 5806–5811.
- 11 M. Costa Gomes, L. Pison, C. Červinka and A. Padua, Porous Ionic Liquids or Liquid Metal-Organic Frameworks?, *Angew. Chemie Int. Ed.*, 2018, **57**, 11909–11912.
- 12 P. Kilaru, G. A. Baker and P. Scovazzo, Density and surface tension measurements of imidazolium-, quaternary phosphonium-, and ammonium-based room-temperature ionic liquids: Data and correlations, *J. Chem. Eng. Data*, 2007, **52**, 2306–2314.
